# Supplementary material for: Development of Oxytolerant Salmonella typhimurium Using Radiation Mutation Technology (RMT) for Cancer Therapy
Source: PubMed Central journal article supplement (PMC7048768; doi:10.1038/s41598-020-60396-6), 2020-02-28
Supplement: 41598_2020_60396_MOESM1_ESM.pdf [file 41598_2020_60396_MOESM1_ESM.pdf]

**Development of Oxytolerant *Salmonella typhimurium* Using Radiation Mutation Technology (RMT) for  
Cancer Therapy**

**Shuang Gao<sup>1,2</sup>, Jong-Hyun Jung<sup>1,3</sup>, Shun-Mei Lin<sup>1,2</sup>, A-Yeung Jang<sup>1,4</sup>, Yong Zhi<sup>1,3</sup>, Ki Bum Ahn<sup>1</sup>, Hyun-Jung  
Ji<sup>1</sup>, Jae Hyang Lim<sup>5</sup>, Huichen Guo<sup>6</sup>, Hyon E. Choy<sup>2</sup>, Sangyong Lim<sup>1,3,\*</sup>, Ho Seong Seo<sup>1,3,\*</sup>**

<sup>1</sup>Research Division for Radiation Science, Korea Atomic Energy Research Institute, Jeongseup, Republic of Korea

<sup>2</sup>Department of Molecular Medicine (BrainKorea21 Plus), Chonnam National University Graduate School, Gwangju, Republic of Korea

<sup>3</sup>Department of Radiation Science, University of Science and Technology, Daejeon, Republic of Korea

<sup>4</sup>Department of Internal Medicine, Korea University College of Medicine, Seoul, Republic of Korea

<sup>5</sup>Department of Microbiology, College of Medicine, Ewha Womans University, Seoul 07985, Republic of Korea

<sup>6</sup>State Key Laboratory of Veterinary Etiological Biology, National Foot and Mouth Disease Reference Laboratory, Lanzhou Veterinary Research Institute, Chinese Academy of Agricultural Sciences, Lanzhou, China

**\* Corresponding author:**

Ho Seong Seo

Biotechnology Division, Korea Atomic Energy Research Institute, Jeongseup 56212, Republic of Korea. Phone: +82-63-570-3140; Fax: +82-63-570-3238; E-mail: [hoseongseo@kaeri.re.kr](mailto:hoseongseo@kaeri.re.kr)

Sangyong Lim

Biotechnology Division, Korea Atomic Energy Research Institute, Jeongseup 56212, Republic of Korea. Phone: +82-63-570-3141; Fax: +82-63-570-3238; E-mail: [saylim@kaeri.re.kr](mailto:saylim@kaeri.re.kr)

Contents:

Supplementary Methods

Supplementary Figures (S1, S2, S3, S4 and S5)

Full length blots for each Figure

Supplementary Tables (S1, S2, S3, S4 and S5)

## **Supplementary Methods**

### **Cell viability analysis.**

CT26 cells ( $8 \times 10^3$  cells/well) were cultured in 96-well plates (eight replicate wells), followed by transfection with the plasmids and incubated for 5, 24, 48, and 72 h at 37°C in the presence of 5% CO<sub>2</sub>. Reagents of the cell counting kit-8 (Dajindo Laboratories; Kumamoto, Japan) were added at the above time points and cultured for another 1–4 h. The absorbance values at 450 nm were read on a Victor™ X3 2030 multi-label reader (PerkinElmer; Waltham, MA, USA).

### **Cell apoptosis analysis.**

CT26 cells were seeded on 6-well plates at a density of  $1 \times 10^6$  cells/well and transfected with the plasmids. Forty-eight hours after transfection, the cells were collected and washed twice with cold PBS and then resuspended in 100 µl DMEM with 1% FBS. The cells were then incubated with 10 µl each of annexin V and propidium iodide (PI) for 20 min at room temperature in the dark, followed by analysis using the Muse™ cell analyzer within 1 h according to the manufacturer's instruction (EMD Millipore Bioscience; Darmstadt, Germany).

### **Quantitative reverse transcription polymerase chain reaction (qRT-PCR).**

Total RNA from *Salmonella* strains or CT26 cells was isolated using the Trizol reagent (Invitrogen) and purified using the RNeasy kit (Qiagen; Hilden, Germany). RNA concentration was measured using a nano photometer (Implen; Minich, Germany) according to the manufacturer's instructions. cDNAs were synthesized from 1.0 µg RNA using PrimeScript™ first strand cDNA synthesis kit (Takara Bio Inc.; Shiga, Japan) according to the manufacturer's instructions. Primers for qRT-PCR were designed using the Primer Express v2.0 software and are shown in Table S4. qRT-PCR amplification was performed using SYBR Premix EX Taq (Takara Bio Inc.) on a Bio-Rad CFX Connect real-time system (Bio-Rad; Hercules, CA, USA). Relative quantification of gene expression was determined using the comparative threshold ( $\Delta\Delta C_r$ ) method.  $\beta$ -actin was used as the control to normalize expression levels.

## Supplementary Figures

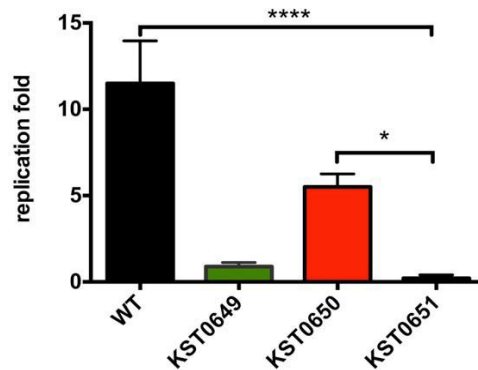

**Fig. S1. KST0650 has higher intracellular replication ability in CT26 cell.** CT26 cells were infected with WT, KST0649, KST0650 or KST0651 strains at MOI=10 and intracellular bacterial number was enumerated and changes of relative *Salmonella* replication fold were analyzed by the ratio of each *Salmonella* strain in CT26 cells at 18 h and 2 h post-infection. Data are represented as mean  $\pm$  SEM from the three independent experiments, asterisks (\*) indicates a significant difference between each group. (\*,  $P < 0.05$ ; \*\*\*\*,  $P < 0.0001$ .)

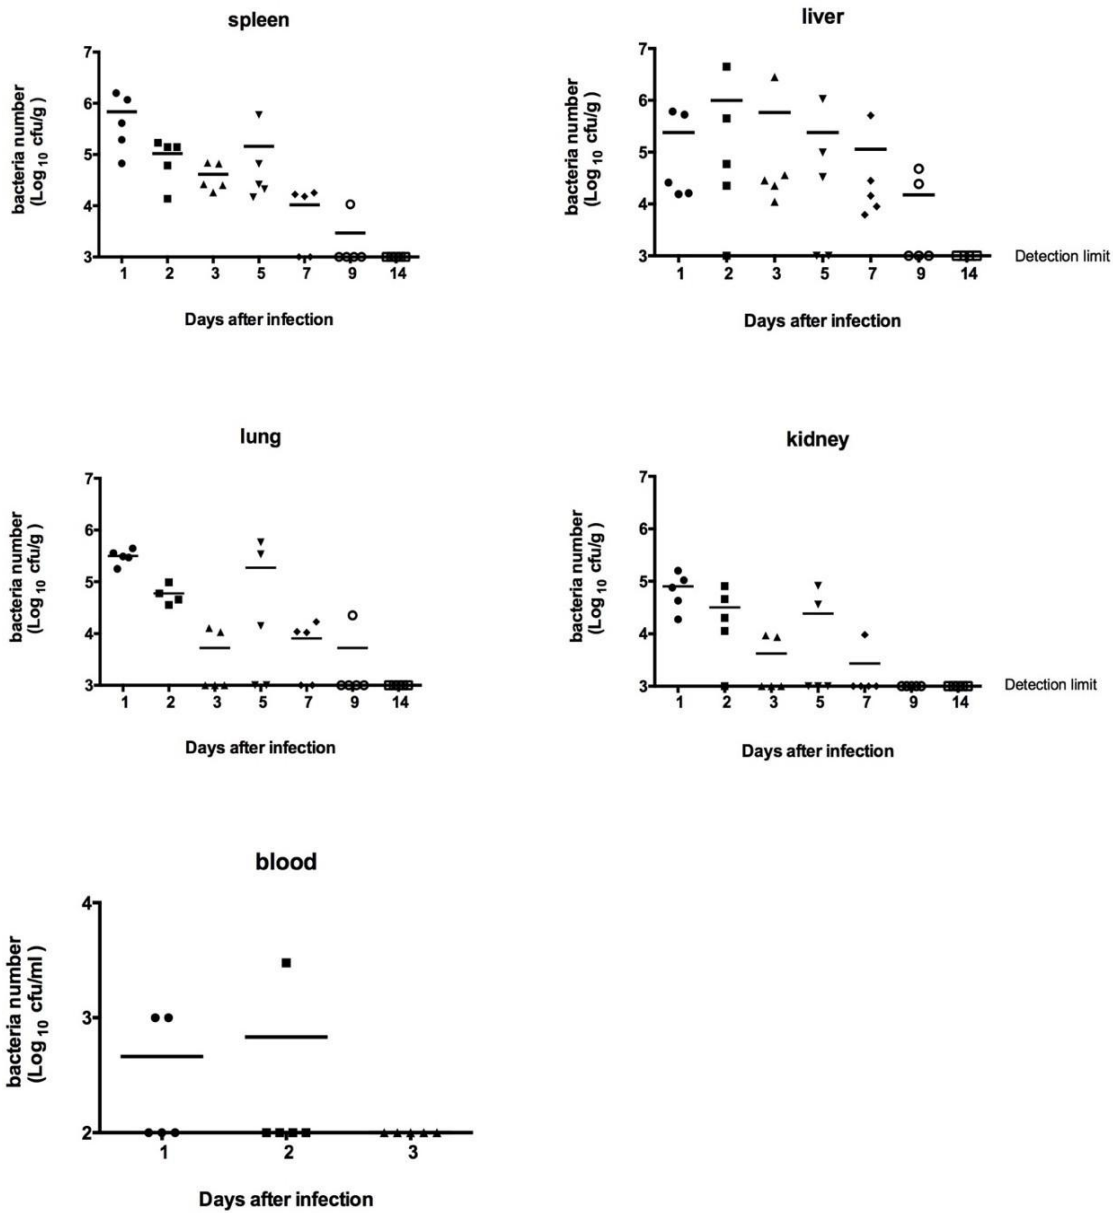

**Fig. S2. Clearance of KST0650 in tumor bearing mice.** CT26 cancer cell bearing mice were injected i.p. with  $1 \times 10^6$  cfu KST0650. The numbers of KST0650 in normal tissues of BALB/c mice were calculated for 14 days.

**a**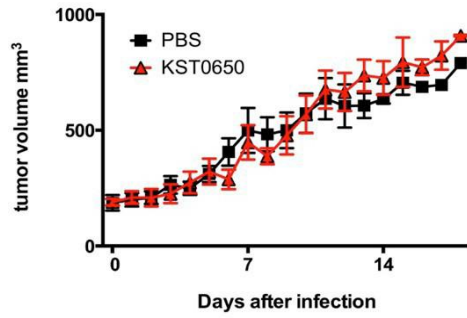**b**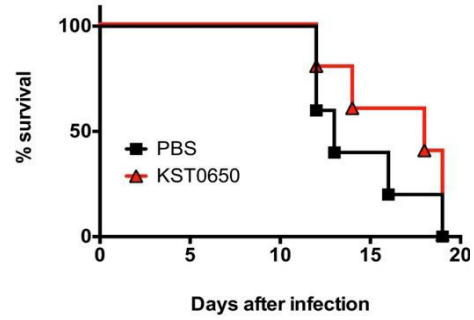

**Fig. S3. Suppression of CT26 tumors by KST0650.** CT26 cancer cell bearing BALB/c mice were injected i.p. with  $1 \times 10^6$  cfu KST0650. **(A)** CT26 tumor sizes on BALB/c mice were measured after PBS or KST0650 infection. **(B)** Survival of CT26 tumor bearing mice was monitored for 20 days after PBS or KST0650 infection.

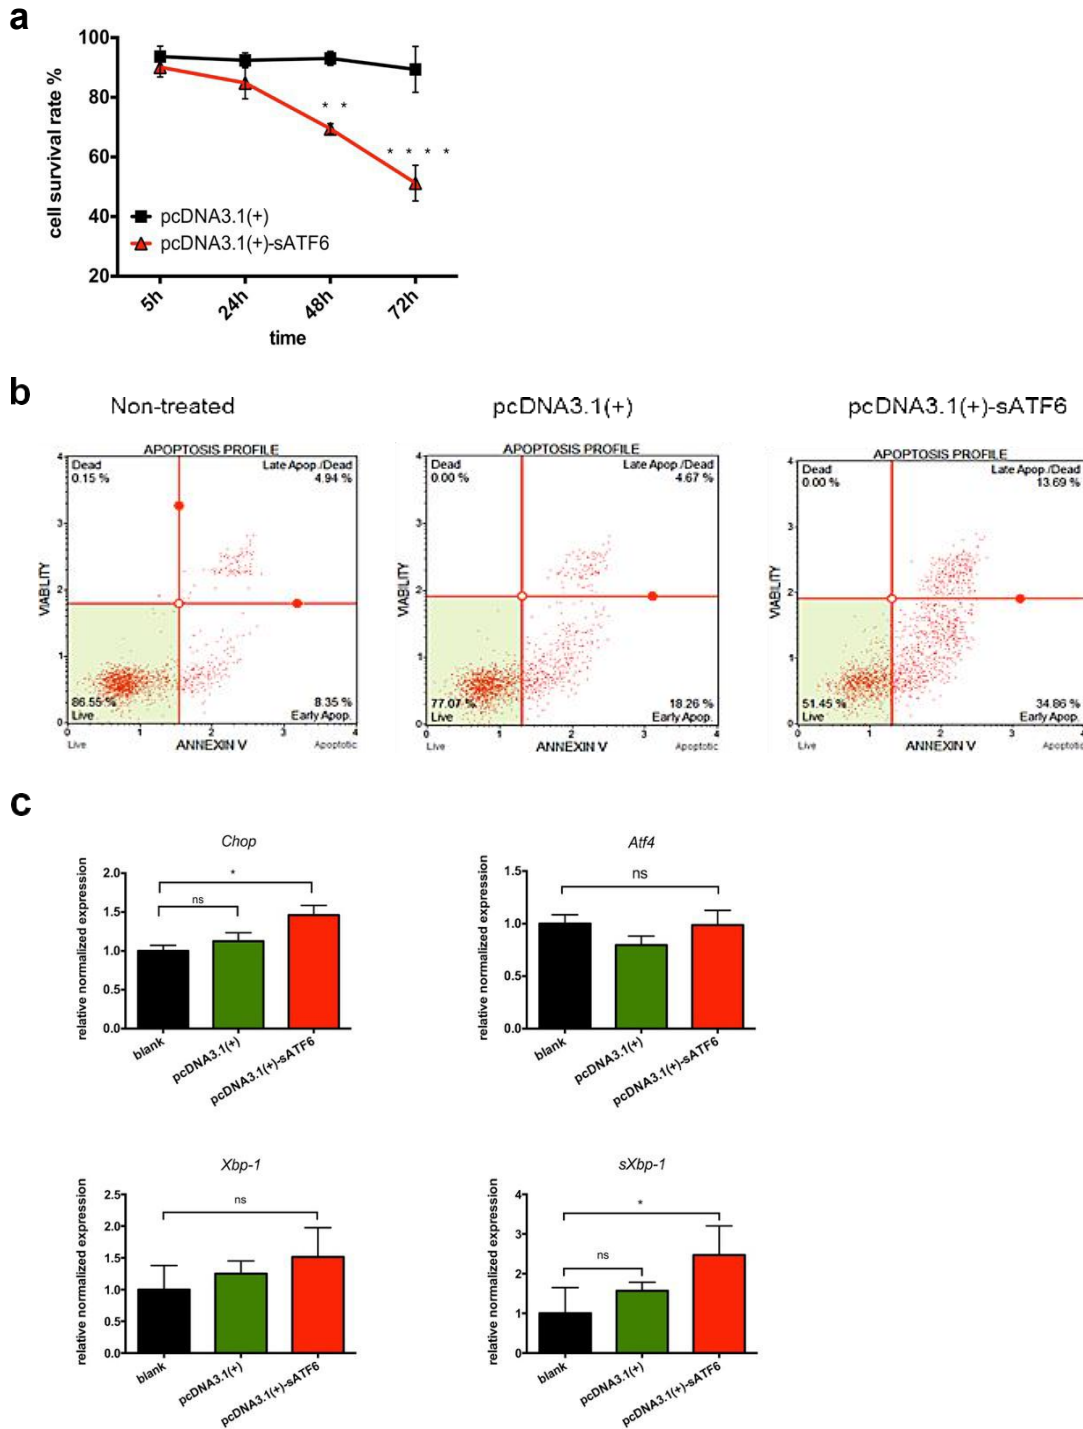

**Fig. S4. Apoptotic effect of sATF6 overexpression in CT26 cancer cell.** CT26 cell monolayers were transfected with pcDNA3.1(+) or sATF6 expressing vector pcDNA3.1(+)-sATF6. **(A)** sATF6 overexpression inhibited CT26 cell proliferation. Relative cell proliferations were

measured by CCK-8 assay. **(B)** sATF6 overexpression induced CT26 apoptosis and necrosis. Apoptotic and necrotic rates of CT26 cell were determined at 48 h after transfection using Annexin V binding-7-AAD staining assay using Muse™ Cell Analyzer. **(C)** sATF6 overexpression induced Chop and sXbp-1 mRNA expression in CT26 cell. ERS related genes *Chop*, *Atf4*, *Xbp1* and *sXbp-1* expression levels in CT26 cells were evaluated by quantitative real-time PCR at 48 h after transfection. Values were normalized to amount of  $\beta$ -actin gene. Data are represented as mean  $\pm$  SEM from the three independent experiments and asterisks (\*) indicates a significant difference between each group. (ns, no significant; \*,  $P < 0.05$ ; \*\*,  $P < 0.01$ ; \*\*\*\*,  $P < 0.0001$ .)

Full length blots for each Figure

Fig.3b

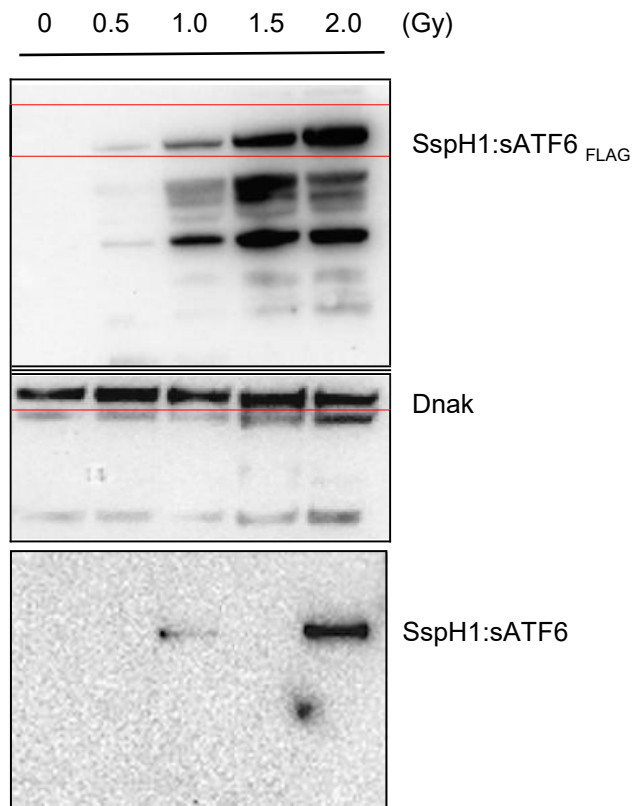

Fig.3c

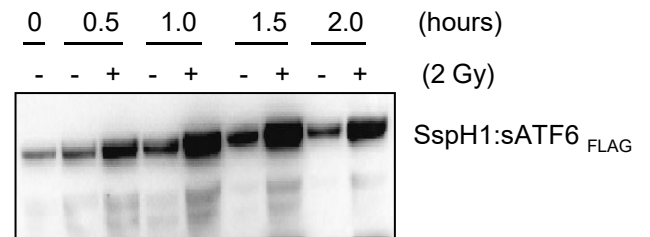



**Fig.4a**

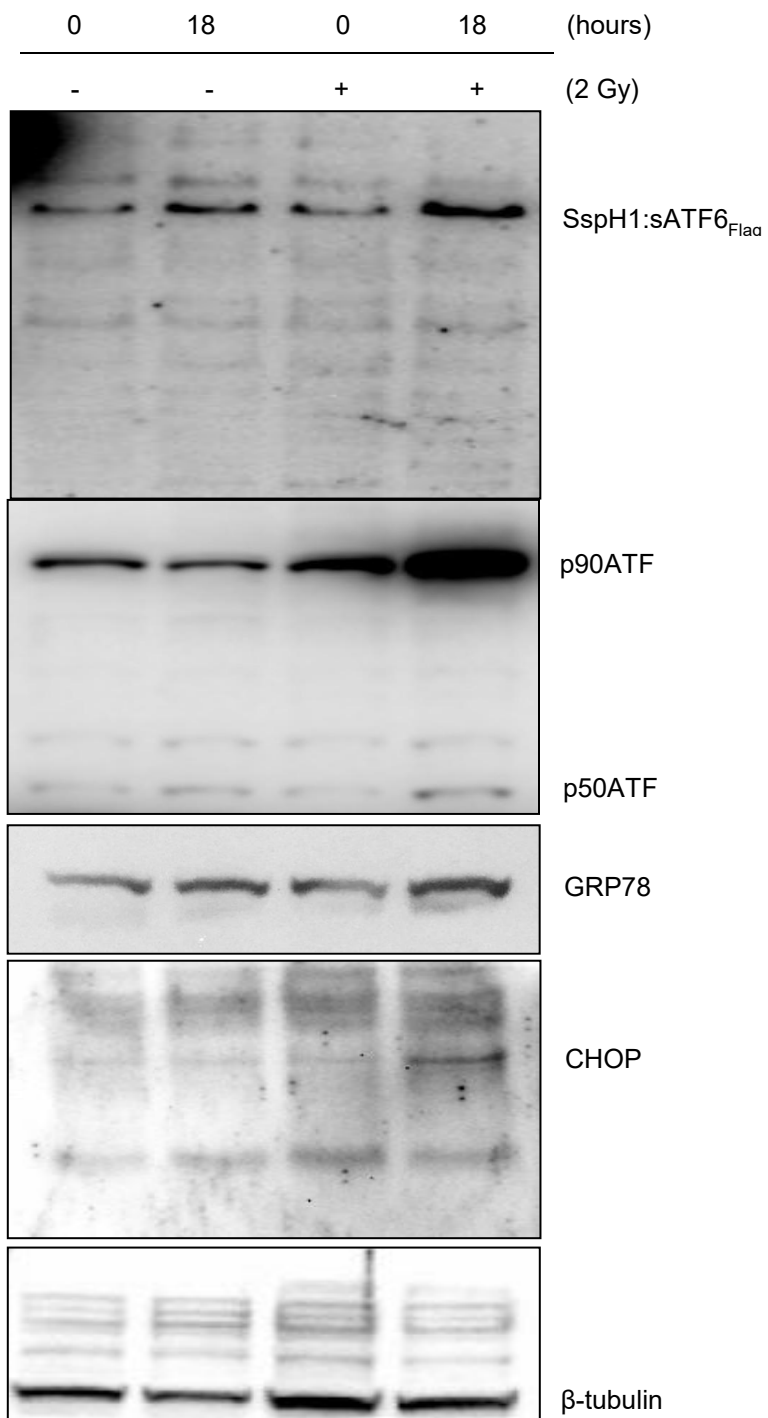

### Supplementary Tables

**Table S1.** LD<sub>50</sub> of WT, KST050 and KST0651 in BALB/c mice. BALB/c mice (n=4) were injected i.p. with indicated number of *Salmonella* and monitored their survival for 7 days

|                | <b>5×10<sup>8</sup> CFU</b> | <b>1×10<sup>8</sup> CFU</b> | <b>2×10<sup>7</sup> CFU</b> | <b>4×10<sup>6</sup> CFU</b> | <b>8×10<sup>5</sup> CFU</b> | <b>1.6×10<sup>5</sup> CFU</b> | <b>3×10<sup>4</sup> CFU</b> |
|----------------|-----------------------------|-----------------------------|-----------------------------|-----------------------------|-----------------------------|-------------------------------|-----------------------------|
| <b>WT</b>      | 0/4                         | 0/4                         | 0/4                         | 0/4                         | 0/4                         | 0/4                           | 1/4                         |
| <b>KST0650</b> | 0/4                         | 0/4                         | 2/4                         | 4/4                         | 4/4                         | 4/4                           | 4/4                         |
| <b>KST0651</b> | 0/4                         | 0/4                         | 0/4                         | 4/4                         | 4/4                         | 4/4                           | 4/4                         |

**Table S2.** Location of mutations in KST0650 genome

|    | Gene ID | Gene Name  | Position | LT2                       | KST0650 | Mutation     | Type      | Function                                      |
|----|---------|------------|----------|---------------------------|---------|--------------|-----------|-----------------------------------------------|
| 1  |         | NCR†       | 28092    | AGGCCTAGG                 | AGG     | deletion     | -         |                                               |
| 2  |         | NCR        | 32469    | T                         | G       | transversion | -         |                                               |
| 3  | PSLT104 | traD       | 86180    | GCCGCAACAGCCG<br>CAACAGCC | GCC     | deletion     | Deletion  | ATP-binding protein/DNA transporter           |
| 4  | STM0153 | aceF       | 180034   | CG                        | GC      | inversion    | Non-sense | dihydroliipoamide acetyltransferase           |
| 5  | STM0157 | yacH       | 184305   | CG                        | GC      | inversion    | Mis-sense | putative outer membrane protein               |
| 6  |         | NCR*       | 220824   | GC                        | GCC     | insertion    | -         |                                               |
| 7  |         | NCR        | 288835   | C                         | T       | transition   | -         |                                               |
| 8  |         | NCR        | 288843   | C                         | A       | transversion | -         |                                               |
| 9  |         | NCR        | 288853   | C                         | T       | transition   | -         |                                               |
| 10 | STM0249 | rrsH (NCR) | 290717   | C                         | A       | transversion | -         | 16S ribosomal RNA                             |
| 11 | STM0395 | sbcC       | 448377   | A                         | G       | transition   | Silent    | ATP-dependent dsDNA exonuclease               |
| 12 | STM0399 | brnQ       | 453938   | C                         | T       | transition   | Silent    | branched-chain amino acid transporter         |
| 13 |         | NCR        | 510550   | G                         | GC      | insertion    | -         |                                               |
| 14 |         | NCR        | 520411   | GC                        | GCC     | insertion    | -         |                                               |
| 15 | STM0547 | fimH       | 608856   | G                         | C       | transversion | Mis-sense | minor fimbrial subunit                        |
| 16 | STM0627 | dcuC       | 691691   | C                         | T       | transition   | Mis-sense | dicarboxylate transporter                     |
| 17 | STM0682 | nagC       | 742049   | G                         | A       | transition   | Silent    | N-acetylglucosamine repressor, NagC           |
| 18 | STM0835 | STM0835    | 902371   | G                         | A       | transition   | Mis-sense | iron (metal) dependent repressor, DtxR family |
| 19 | STM0845 | moeB       | 915161   | G                         | A       | transition   | Mis-sense | [molybdopterin synthase] sulfurylase          |
| 20 | STM0939 | STM0939    | 1016587  | CG                        | GC      | inversion    | Mis-sense | hypothetical protein                          |

|    |           |         |         |                        |            |              |                        |                                                                 |
|----|-----------|---------|---------|------------------------|------------|--------------|------------------------|-----------------------------------------------------------------|
| 21 | STM1043   | STM1043 | 1129916 | GCGCCTAGGTGCT<br>TGGCG | GCG        | deletion     | Deletion               | Gifsy-2 prophage attachment and invasion protein homolog        |
| 22 | STM1124   | putA    | 1208418 | GCC                    | GCCC       | insertion    | Frame-shift*           | amino acid dehydrogenase                                        |
| 23 |           | NCR     | 1256605 | GC                     | GCC        | insertion    | -                      |                                                                 |
| 24 | STM1280   | yeaL    | 1357016 | CG                     | CGG        | insertion    | Frame-shift            | putative inner membrane protein                                 |
| 25 | STM1285   | yeaG    | 1363418 | GCCCCCCCCC             | GCCCCCCCCC | insertion    | Frame-shift*           | putative serine protein kinase, PrkA                            |
| 26 |           | NCR     | 1430155 | AC                     | ACC        | insertion    | -                      |                                                                 |
| 27 |           | NCR     | 1435558 | TG                     | T          | deletion     | -                      |                                                                 |
| 28 | STM1425   | mdtK    | 1503292 | CG                     | GC         | inversion    | Mis-sense              | multidrug efflux protein NorA                                   |
| 29 | STM1444   | slyA    | 1520176 | CG                     | GC         | inversion    | Mis-sense <sup>a</sup> | transcriptional regulator SlyA                                  |
| 30 | STM1462.S | ydgJ    | 1536627 | CG                     | GC         | inversion    | Mis-sense              | putative oxidoreductase                                         |
| 31 | STM1468   | fumA    | 1543815 | CGG                    | CG         | deletion     | Frame-shift*           | fumarase, class I, homodimeric (EC 4.2.1.2)                     |
| 32 |           | NCR     | 1554186 | GC                     | GCC        | insertion    | -                      |                                                                 |
| 33 |           | NCR     | 1670337 | TCC                    | TCCC       | Insertion    | -                      |                                                                 |
| 34 | STM1626   | trg     | 1715973 | CG                     | GC         | inversion    | Mis-sense              | methyl-accepting chemotaxis sensory transducer with TarH sensor |
| 35 | STM1702   | mb      | 1795046 | G                      | A          | transition   | Non-sense              | exoribonuclease II                                              |
| 36 |           | NCR     | 1841404 | G                      | A          | transition   | -                      |                                                                 |
| 37 | STM1753   | hnr     | 1849214 | G                      | A          | transition   | Non-sense              | response regulator                                              |
| 38 | STM1753   | hnr     | 1849648 | A                      | C          | transversion | Mis-sense              | response regulator                                              |
| 39 | STM1805   | fadR    | 1906120 | C                      | T          | transition   | Silent                 | transcriptional regulator, GntR family                          |
| 40 | STM1828   | yoaE    | 1926893 | CGCG                   | CGCGGCG    | insertion    | Insertion              | putative inner membrane protein                                 |
| 41 | STM2107   | wcaH    | 2191593 | GCC                    | GCCC       | insertion    | Frame-shift*           | GDP-mannose mannosyl hydrolase                                  |
| 42 | STM2115   | wcaA    | 2198183 | C                      | T          | transition   | Mis-sense              | putative glycosyl transferase                                   |
| 43 | STM2194   | yeiG    | 2292159 | CG                     | CGG        | insertion    | Frame-shift            | putative esterase                                               |

|    |         |            |         |           |         |              |                        |                                                                                                                                    |
|----|---------|------------|---------|-----------|---------|--------------|------------------------|------------------------------------------------------------------------------------------------------------------------------------|
| 44 | STM2318 | nuoL       | 2427979 | C         | G       | transversion | Silent                 | NADH dehydrogenase subunit L (EC 1.6.5.3)                                                                                          |
| 45 | STM2389 | fadI       | 2500654 | CG        | GC      | inversion    | Mis-sense              | 3-ketoacyl-CoA-thiolase                                                                                                            |
| 46 | STM2425 | yfeH       | 2537941 | CG        | GC      | inversion    | Mis-sense <sup>a</sup> | putative Na <sup>+</sup> -dependent transporter                                                                                    |
| 47 | STM2438 | STM2438    | 2550665 | CG        | GC      | inversion    | Mis-sense <sup>a</sup> | putative periplasmic protein                                                                                                       |
| 48 |         | NCR        | 2627555 | AC        | ACC     | insertion    | -                      |                                                                                                                                    |
| 49 | STM2528 | STM2528    | 2661659 | G         | C       | transversion | Mis-sense              | putative dimethylsulfoxide reductase                                                                                               |
| 50 |         | NCR        | 2682821 | CGG       | CGGG    | insertion    | -                      |                                                                                                                                    |
| 51 | STM2553 | csiE       | 2691581 | G         | T       | transversion | Non-sense              | transcriptional antiterminator, BglG family                                                                                        |
| 52 | STM2553 | csiE       | 2692225 | C         | T       | transition   | Silent                 | transcriptional antiterminator, BglG family                                                                                        |
| 53 | STM2589 | STM2589    | 2737591 | GCC       | GCCC    | insertion    | Frame-shift            | host specificity protein-J-like                                                                                                    |
| 54 | STM2609 | STM2609    | 2757548 | CG        | CGG     | insertion    | Frame-shift            | DNA packaging-like protein                                                                                                         |
| 55 | STM2619 | STM2619    | 2763753 | A         | T       | transversion | Silent                 | hypothetical protein                                                                                                               |
| 56 | STM2689 | NCR        | 2834545 | GCC       | GCCC    | insertion    | -                      | pseudogene                                                                                                                         |
| 57 | STM2851 | hycC       | 2996778 | CG        | GC      | inversion    | Mis-sense              | NADH dehydrogenase subunit N                                                                                                       |
| 58 | STM2857 | hypD       | 3001700 | CGCG      | CGCGGCG | insertion    | Insertion              | Hydrogenase maturation protein HypD                                                                                                |
| 59 | STM2971 | sdaB       | 3123348 | CG        | GC      | inversion    | Mis-sense              | L-serine ammonia-lyase (EC 4.3.1.17)                                                                                               |
| 60 | STM2975 | fucP (NCR) | 3127648 | TGGG      | TGG     | insertion    | -                      | pseudogene                                                                                                                         |
| 61 | STM2996 | recC       | 3154019 | CG        | GC      | inversion    | Mis-sense <sup>a</sup> | DNA helicase/exodeoxyribonuclease V, gamma subunit (EC 3.1.11.5)                                                                   |
| 62 | STM3024 | yohM       | 3184542 | CCACGACCA | CCA     | deletion     | Deletion               | Ni/Co efflux system                                                                                                                |
| 63 | STM3057 | ubiH       | 3219132 | CG        | GC      | inversion    | Mis-sense              | 2-octaprenyl-3-methyl-6-methoxy-1,4-benzoquinol hydroxylase (EC 1.14.13.-)/2-octaprenyl-6-methoxyphenol hydroxylase (EC 1.14.13.-) |
| 64 |         | NCR        | 3253332 | AGG       | AGGG    | insertion    | -                      |                                                                                                                                    |

|    |            |         |         |                                                      |            |              |              |                                                                       |
|----|------------|---------|---------|------------------------------------------------------|------------|--------------|--------------|-----------------------------------------------------------------------|
| 65 | STM3145    | hybE    | 3307825 | C                                                    | T          | transition   | Mis-sense    | Tat proofreading chaperone HybE                                       |
| 66 | STM3415    | rpoA    | 3583381 | T                                                    | C          | transition   | Mis-sense    | DNA-directed RNA polymerase subunit alpha (EC 2.7.7.6)                |
| 67 | STM3463    | STM3463 | 3613715 | AGGG                                                 | AGGGG      | insertion    | Frame-shift* | hypothetical protein                                                  |
| 68 | STM3500    | pckA    | 3657650 | AC                                                   | ACGCC      | insertion    | Insertion    | phosphoenolpyruvate carboxykinase                                     |
| 69 | STM3513    | malQ    | 3673617 | A                                                    | C          |              | Mis-sense    | 4-alpha-glucanotransferase (EC 2.4.1.25)                              |
| 70 | STM3514    | malP    | 3674896 | AGCAACGCCGCAA<br>GCTGCGGATTGCA<br>CTGTTTAATCCAG<br>C | AGC        | deletion     | Frame-shift* | maltodextrin phosphorylase                                            |
| 71 |            | NCR     | 3676853 | CAAAAAAAAA                                           | CAAAAAAAAA | deletion     | -            |                                                                       |
| 72 | STM3530    | NCR     | 3694175 | CG                                                   | CGG        | insertion    | Frame-shift  | pseudogene                                                            |
| 73 | STM3633    | STM3633 | 3819803 | T                                                    | C          | transition   | Silent       | transcriptional regulator, LacI family                                |
| 74 | STM3784    | STM3784 | 3984132 | T                                                    | C          | transition   | Mis-sense    | PTS system unknown substrate IIA component, Gat family (TC 4.A.5.1.4) |
| 75 | STM3828.1N | NCR     | 4031933 | GC                                                   | GCC        | insertion    | -            | pseudogene                                                            |
| 76 | STM3913    | gppA    | 4122924 | C                                                    | A          | transversion | Mis-sense    | guanosine<br>pentaphosphatase/exopolyphosphatase                      |
| 77 | STM3913    | gppA    | 4122930 | T                                                    | C          | transition   | Mis-sense    | guanosine<br>pentaphosphatase/exopolyphosphatase                      |
| 78 | STM3974    | tatB    | 4180828 | CAA                                                  | C          | deletion     | Frame-shift* | Sec-independent protein translocase TatB                              |
| 79 |            | NCR     | 4350855 | C                                                    | G          | transversion | -            |                                                                       |
| 80 |            | NCR     | 4350856 | A                                                    | C          | transversion | -            |                                                                       |
| 81 | STM4167    | hemE    | 4384227 | G                                                    | A          | transition   | Mis-sense    | uroporphyrinogen decarboxylase (EC 4.1.1.37)                          |
| 82 | STM4211.1N | NCR     | 4433282 | GTC                                                  | GTCTC      | insertion    | Frame-shift  | pseudogene                                                            |

|    |         |         |         |     |      |           |                        |                                                  |
|----|---------|---------|---------|-----|------|-----------|------------------------|--------------------------------------------------|
| 83 |         | NCR     | 4459985 | GC  | GCC  | insertion | -                      |                                                  |
| 84 |         | NCR     | 4606271 | TGG | TG   | deletion  | -                      |                                                  |
| 85 | STM4393 | rpsR    | 4631400 | CG  | GC   | inversion | Mis-sense              | SSU ribosomal protein S18P                       |
| 86 |         | NCR     | 4673419 | GTT | GTTT | insertion | -                      |                                                  |
| 87 | STM4431 | STM4431 | 4675814 | GCC | GCCC | insertion | Frame-shift*           | putative thiamine pyrophosphate-requiring enzyme |
| 88 | STM4447 | STM4447 | 4689233 | AG  | AGG  | insertion | Frame-shift*           | putative periplasmic protein                     |
| 89 | STM4577 | smp     | 4832867 | CG  | GC   | inversion | Mis-sense <sup>a</sup> | hypothetical protein                             |

<sup>†</sup>NCR: non-coding region

<sup>a</sup>Mis-sense = Two amino acids were changed by the mutation

\*Frame-shift = protein sequences were truncated by frame-shift

**Table S3.** Strains and plasmids used in this study

| <b>Strain or plasmid</b>       | <b>Relevant genotype</b>                                           | <b>Source or reference</b> |
|--------------------------------|--------------------------------------------------------------------|----------------------------|
| <b><i>Escherichia coli</i></b> |                                                                    |                            |
| <b>DH5<math>\alpha</math></b>  | F-r-m <sup>+</sup> Ø80 <i>dlacZ</i> ΔM15                           | Gibco BRL                  |
| <b><i>Salmonella</i></b>       |                                                                    |                            |
| <b>Typhimurium</b>             |                                                                    |                            |
| <b>LT2</b>                     | Wild type                                                          | ATCC*700720                |
| <b>KST0649</b>                 | LT2Δ <i>ptsI</i> Δ <i>crr</i>                                      | this study                 |
| <b>KST0650</b>                 | Irradiated mutant in LT2Δ <i>ptsI</i> Δ <i>crr</i>                 | this study                 |
| <b>KST0651</b>                 | LT2Δ <i>relA</i> Δ <i>spoT</i>                                     | this study                 |
| <b>KST0652</b>                 | KST0650 with pRS-sATF6                                             | this study                 |
| <b>Plasmid</b>                 |                                                                    |                            |
| <b>pcDNA3.1(+)</b>             | Mammalian expression vector                                        | ThermoFisher               |
| <b>pcDNA3.1(+)-sATF6</b>       | sATF6 expressing plasmid                                           | this study                 |
| <b>pET28a(+)</b>               | Protein expression vector                                          | Novagen                    |
| <b>pRS</b>                     | Replace T7 promoter with RecN promoter                             | this study                 |
| <b>pRS-sATF6</b>               | sATF6 expressing plasmid under controlling by <i>recN</i> promoter | this study                 |

\*, ATCC: American Type Culture Collection



**Table S4.** Primers used in this study

| <b>Target gene</b>   | <b>Primer name</b> | <b>Primer sequence (5'-3')</b>                                                 |
|----------------------|--------------------|--------------------------------------------------------------------------------|
| <b>recN promoter</b> | 3173               | TCA GAT CTG AGG TTT ATA TTG ATG AAA C                                          |
|                      | 5173               | TTT CTA GAA GCT GTT TTC CTG TAT GAA                                            |
| <b>sspH1</b>         | 3168               | AAT CCA TGG CTT GAT GCG TGT GTC TGC G                                          |
|                      | 5174               | TTG CGG CCG CTT CTG TGC ATT CCT CTC CCG                                        |
| <b>sATF6 cloning</b> | 3176               | AGG CGG CCG CAA TGG AGT CGC CTT TTA GTC CGG                                    |
|                      | 5176               | TTC TCG AGT TAT TTA TCG TCA TCG TCT TTG TAG<br>TCA CTT GGG ACT TTG AGC CTC TGG |
| <b>sATF6 RT-PCR</b>  | 3184               | GGA AGC TTC TAT GGA GTC GCC TTT TAG TCC GG                                     |
|                      | 5184               | TTG CGG CCG CGA CTT GGG ACT TTG AGC CTC                                        |
| <b>ATF6 RT-PCR</b>   | ATF6-F             | TCC TGA ACA GCG AAG TGT TG                                                     |
|                      | ATF6-R             | ACC CAT GAG GTT TCA AGT CC                                                     |
| <b>Chop RT-PCR</b>   | CHOP-F             | CTG GAA GCC TGG TAT GAG GAT                                                    |
|                      | CHOP-R             | CAG GGT CAA GAG TAG TGA AGG T                                                  |
| <b>Xbp-1 RT-PCR</b>  | Xbp-1-F            | TGG CCG GGT CTG CTG AGT CCG                                                    |
|                      | Xbp-1-R            | GTC CAT GGG AAG ATG TTC TGG                                                    |
| <b>sXbp-1 RT-PCR</b> | sXbp-1-F           | CTG AGT CCG AAT CAG GTG CAG                                                    |
|                      | sXbp-1-R           | GTC CAT GGG AAG ATG TTC TGG                                                    |

**Table S5.** Antibodies used in this study

| <b>Antibody</b>  | <b>Company</b> | <b>Catalog No.</b> |
|------------------|----------------|--------------------|
| FLAG             | Sigma          | F1804              |
| ATF6             | Santa Cruz     | sc-166659          |
| $\beta$ -tubulin | Santa Cruz     | sc-9104            |
| GRP78            | Abcam          | ab21685            |
| DDIT3            | Abcam          | ab11419            |
| Dnak             | Assay Designs  | SPA-880            |
